# Supplementary material
Source: publisher figshare collection journal article supplement (https://acs.figshare.com/ndownloader/files/22412910)
Supplement: Supplementary file 1 [file 22412910]

## Supporting Information

### **SnS Micro/Nanocrystals with Urchinlike Architectures for Capture of Au(III), Pt(IV), and Pd(II)**

Zhen Qin,<sup>†</sup> Xianqing Tang,<sup>†</sup> Yingchun Su,<sup>§</sup> Zhibin He,<sup>†</sup> Yunteng Qu<sup>\*,‡</sup> and Shanshan Tong<sup>\*,†</sup>

<sup>†</sup>*College of Chemistry and Pharmacy, Northwest A&F University, Yangling, Shaanxi 712100,  
P. R. China*

<sup>‡</sup>*Department of Chemistry, Hefei National Laboratory for Physical Sciences at the Microscale,  
iChEM (Collaborative Innovation Center of Chemistry for Energy Materials),  
University of Science and Technology of China, Hefei 230026, China*

<sup>§</sup>*Interdisciplinary Nanoscience Center, Aarhus University, DK-8000 Aarhus C, Denmark*

<sup>\*</sup> Corresponding author.

E-mail: tongss@nwsuaf.edu.cn. (S. TONG)

E-mail: quyt@ustc.edu.cn (Y. TENG)

## **Supporting Information Index:**

**Experimental section**

**Reagents**

**Apparatus**

**Synthesis of urchinlike SnS microcrystals**

**Material characterization**

**Batch adsorption experiments**

**Desorption experiment**

**Adsorption isotherm**

**Adsorption kinetics**

**Adsorption thermodynamics**

**Figure S1-S12**

**Table S1-S2**

## Experimental section

### Reagents

Polyvinyl pyrrolidone (PVP,  $M = 40000$ ), Pluronic F-127 (F127, average molecular weight 12600), and thioacetamide ( $\text{CH}_3\text{N}_2\text{S}$ ) were provided by Sigma-Aldrich. Tin (II) chloride dehydrate ( $\text{SnCl}_2$ ) and ethylene glycol were purchased from Aladdin Co. (Shanghai, China). Hydrochloric acid (HCl), and absolute ethyl alcohol were obtained from Beijing Chemical Corp. (China).

Standard stock solutions ( $1000 \text{ mg L}^{-1}$ ) of  $\text{Au}^{3+}$ ,  $\text{Pd}^{2+}$ , and  $\text{Pt}^{4+}$  containing  $1.5 \text{ mol L}^{-1}$  HCl, were purchased from Aladdin Co. The stock solutions ( $1000 \text{ mg L}^{-1}$ ) of  $\text{Pb}^{2+}$ ,  $\text{Cd}^{2+}$ ,  $\text{Co}^{2+}$ ,  $\text{Ni}^{2+}$ ,  $\text{Zn}^{2+}$ ,  $\text{Mn}^{2+}$ ,  $\text{Fe}^{3+}$ ,  $\text{Ca}^{2+}$ ,  $\text{Mg}^{2+}$ , and  $\text{Na}^+$  were separately prepared by standard methods from  $\text{PbCl}_2$ ,  $\text{CdCl}_2$ ,  $\text{CoCl}_2$ ,  $\text{NiCl}_2$ ,  $\text{ZnCl}_2$ ,  $\text{MnCl}_2$ ,  $\text{FeCl}_3$ ,  $\text{CaCl}_2$ ,  $\text{MgCl}_2$ , and  $\text{NaCl}$ . Working standard solutions were obtained by appropriate dilution of the stock standard solutions. All the reagents used were of analytical grade or better. All glass vessels used for analysis were cleaned before use by soaking them in 10 % nitric acid solution for at least 24 h and then rinsed thoroughly with ultrapure water.

### Apparatus

The measurements of metal ion were performed by a flame atomic absorption spectrometry (FAAS, TAS-990, Beijing Purkinje General Instruments Co. Ltd., China). Operational parameters of wavelength of  $\text{Au}^{3+}$ ,  $\text{Pd}^{2+}$ , and  $\text{Pt}^{4+}$  were 242.8 nm, 244.8 nm and 265.9 nm, respectively, while that was recommended by the manufacturer for the determination of other metal ions.

A PB-10 digital pH meter (Sartorius Corporation, Germany) was carried out for the pH

measurements. Adjustment of pH was under taken using HCl and NaOH. Deionized water used throughout all experiments was purified with the Millipore system (Millipore, Milford, MA, USA).

### **Synthesis of urchinlike SnS microcrystals**

Urchinlike SnS was prepared according to a one-pot hydrothermal synthesis. 0.2888 g of  $\text{SnCl}_2$  and 0.0962 g of thioacetamide were dissolved in 1.6 mL of ethylene glycol, respectively. 500 mg of PVP (M.W. 40000) was added to 25 mL of ethylene glycol under stirring to obtain a homogeneous solution. Afterwards, the above  $\text{SnCl}_2$  and thioacetamide solution were added to the prepared PVP-ethylene glycol solution, and the obtained solution was well dispersed by sonication for 10 min. Finally, the mixture was transferred into an autoclave and reacted at 160 °C for 12 h in an oven. The resultant product was collected by centrifugation, washed seven times with deionized water and anhydrous ethanol, respectively, and dried at 50 °C overnight under vacuum.

The preparation process of product using F127 is similar to the above method, except for the addition of F127. The synthesis procedure for different product with PVP is same to that for the synthesis of urchinlike SnS microcrystals except that varied amount (0.01 – 6.0 g) of PVP is added into the starting reaction mixture.

### **Material characterization**

X-ray diffraction (XRD) was obtained using a powder diffractometer (Bruker D8 Advanced Diffractometer System) with a Cu Ka ( $1.5418 \text{ \AA}$ ) source. Scanning electron microscope (SEM) measurements were carried out on a FEI Nova Nano SEM-450 equipped with an energy dispersive X-ray spectrometer (EDX) by an accelerating voltage of 10 kV.

Raman spectra were measured on a HORIBA Raman microscope with 532 nm laser excitation. A FEI Tecnai G2 Spirit Bio was used to obtain the Transmission electron microscopy (TEM) images on operating at 80 kV. Power samples were prepared by drop-drying a diluted suspension of the samples in ethanol onto a holey carbon copper grid that was dried under ambient conditions before the measurements. High-resolution TEM (HRTEM) and selected area electron diffraction (SAED) pattern were performed on FEI TF-20 at 200 kV. X-ray photoelectron spectroscopy (XPS) analysis was taken on a VG Multilab 2000 X-ray photoelectron spectrometer with Al K $\alpha$  radiation. Nitrogen adsorption/desorption curves were determined using a Micromeritics ASAP 2010 surface area analyzer with Brunauer-Emmett-Teller (BET) measurement. Thermogravimetric curves (TGA) were collected using a DSC-TGA thermogravimetric analyzer (TGA/DSC 3+, METTLER). The temperature scanning scope was from room temperature to 1000 °C with a heating rate of 10 °C min<sup>-1</sup> and the atmosphere was N<sub>2</sub>.

### **Batch adsorption experiments**

10 mL of certain concentration metal ions were added to  $2 \pm 0.2$  mg of urchinlike SnS as an adsorbent in a vial (50 mL), followed by stirring in a rotary shaker to attain equilibrium. After the adsorption equilibrium, the aqueous phase was filtered and then concentration of residual metal ions was analyzed by FAAS. All the adsorption experiments were performed at ambient condition unless otherwise stated. To research the effect of adsorbent dosage on the uptake of the SnS, the amount of the adsorbent was in the range of 2 – 20 mg. For pH test, the initial pH value of the metal ions was adjusted using 2 M HCl and 2 M NaOH. For kinetic studies, a typical adsorption experiment was performed under 150 mg L<sup>-1</sup> of Au<sup>3+</sup>, 25 mg L<sup>-1</sup>

of  $\text{Pd}^{2+}$ , and  $25 \text{ mg L}^{-1}$  of  $\text{Pt}^{4+}$  with  $2 \pm 0.2 \text{ mg}$  of adsorbent addition for  $\text{Au}^{3+}$ ,  $\text{Pd}^{2+}$ , and  $\text{Pt}^{4+}$ , and the three metal ions concentration at different time intervals was determined. Adsorption isotherm experiments were conducted by adding  $2 \pm 0.2 \text{ mg}$  of adsorbent into  $\text{Au}^{3+}$ ,  $\text{Pd}^{2+}$ , and  $\text{Pt}^{4+}$  solution with concentrations ranging from 20 to  $300 \text{ mg L}^{-1}$ .

The adsorbed amount ( $q_e$ ,  $\text{mg g}^{-1}$ ) and the distribution coefficient ( $K_d$ ) were calculated according to following Eq. (1) and (2).

$$q_e = \frac{(C_i - C_e) \times V}{m} \quad (1)$$

$$K_d = \left( \frac{C_i - C_e}{C_e} \right) \times \frac{V}{m} \quad (2)$$

In Eq. (1) and (2),  $C_i$  is the initial concentration of metal ions ( $\text{mg L}^{-1}$ ), and  $C_e$  is final equilibrium concentrations of metal ions ( $\text{mg L}^{-1}$ ).  $m$  (g) and  $V$  (L) are the adsorbents' weight and the volume of the initial metal ion solution respectively.

### Desorption experiment

The desorption of metal ions on urchinlike SnS was carried out by washing the adsorbent with deionized water several times, then adding the mixture of 1.0 M HCl and 0.5 M thiourea solution to the adsorbent and leaving for 30 min to achieve complete desorption. The recovery of the SnS adsorbents for  $150 \text{ mg L}^{-1}$  of  $\text{Au}^{3+}$ ,  $25 \text{ mg L}^{-1}$  of  $\text{Pd}^{2+}$ , and  $25 \text{ mg L}^{-1}$  of  $\text{Pt}^{4+}$  was tested over six cycles to evaluate their reusability.

### Adsorption isotherm

The Langmuir, Freundlich and Temkin isotherm models were expressed linearly as Eq.3–5:

$$\text{Langmuir model} \quad \frac{C_e}{q_e} = C_e \frac{1}{q_{\max}} + \frac{1}{K_L q_{\max}} \quad (3)$$

$$\text{Freundlich model} \quad \log q_e = \log K_f + \frac{1}{n} \log C_e \quad (4)$$

$$\text{Temkin model} \quad q_e = B \ln A + B \ln C_e \quad (5)$$

where  $C_e$  ( $\text{mg L}^{-1}$ ) is the equilibrium concentration of the solute,  $q_e$  is the amount adsorbed at equilibrium ( $\text{mg g}^{-1}$ ),  $q_{\max}$  is the maximum adsorption at monolayer coverage ( $\text{mg g}^{-1}$ ),  $K_L$  is the adsorption equilibrium constant ( $\text{L mg}^{-1}$ ),  $K_f$  is the Freundlich isotherm constants, and  $n$  is the Freundlich exponent. For the Langmuir isotherm model,  $q_{\max}$  and  $K_L$  could be obtained from the slope and intercept of the linear plot of  $C_e/q_e$  vs.  $C_e$ . For the Freundlich isotherm model,  $K_f$  and  $n$  can be calculated by the slope and intercept of the linear plot of  $\log q_e$  vs.  $\log C_e$ .

### Adsorption kinetics

Conventional kinetic models, e.g. pseudo-first-order, pseudo-second-order, and intra-particle diffusion model, were used to fit the experimental data in this work. The pseudo-first-order and pseudo-second-order models after transformation into linear form were expressed in as Eq. 6 and 7,

$$\text{Pseudo-first-order} \quad \log(q_e - q_t) = \log q_e - \frac{k_1}{2.303} t \quad (6)$$

$$\text{Pseudo-second-order} \quad \frac{t}{q_t} = \frac{1}{k_2 q_e^2} + \frac{1}{q_e} t \quad (7)$$

where  $q_t$  and  $q_e$  ( $\text{mg g}^{-1}$ ) are the amounts of metal ions adsorbed at any time  $t$  (min) and at equilibrium, respectively, and  $k_1$  ( $\text{min}^{-1}$ ) and  $k_2$  ( $\text{g mg}^{-1} \text{ min}^{-1}$ ) are the adsorption rate constants of pseudo-first-order and pseudo-second-order adsorption.  $k_1$  was determined by plotting  $\log(q_e - q_t)$  vs.  $t$  in the pseudo-first-order model. Similarly,  $k_2$  and  $q_e$  were calculated from pseudo-second-order model by plotting  $t/q_t$  vs.  $t$ .

### Adsorption thermodynamics

The effect of the temperature on the adsorption of  $\text{Au}^{3+}$ ,  $\text{Pd}^{2+}$ , and  $\text{Pt}^{4+}$  for  $\text{MoS}_2$  was studied at different temperatures ranging from 278 K to 308 K. The thermodynamic parameters associated with the sorption viz., free energy change ( $\Delta G^\circ$ ), enthalpy change ( $\Delta H^\circ$ ), and entropy change ( $\Delta S^\circ$ ), were calculated as follow equation (8 and 9).

$$\ln K_d = \frac{\Delta S^\circ}{R} - \frac{\Delta H^\circ}{R} \frac{1}{T} \quad (8)$$

$$\Delta G^\circ = \Delta H^\circ - T\Delta S^\circ \quad (9)$$

Where  $R$  is the ideal gas constant ( $8.314 \text{ J mol}^{-1} \text{ K}^{-1}$ ), and  $T$  (K) is the absolution temperature.  $\Delta H^\circ$  and  $\Delta S^\circ$  could be calculated from the slope and intercept of the linear plot of  $\ln K_d$  *versus*  $1/T$ .  $\Delta G^\circ$  was obtained from equation (9).



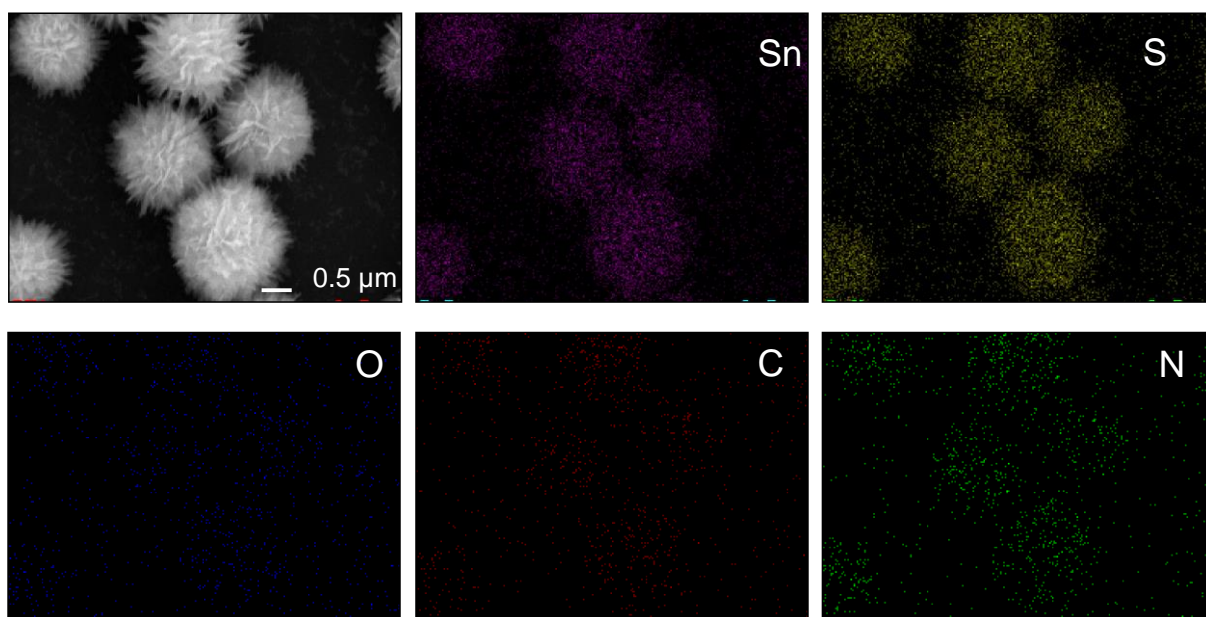

**Figure S1.** SEM image and the corresponding EDX mapping images of the urchinlike SnS microcrystals

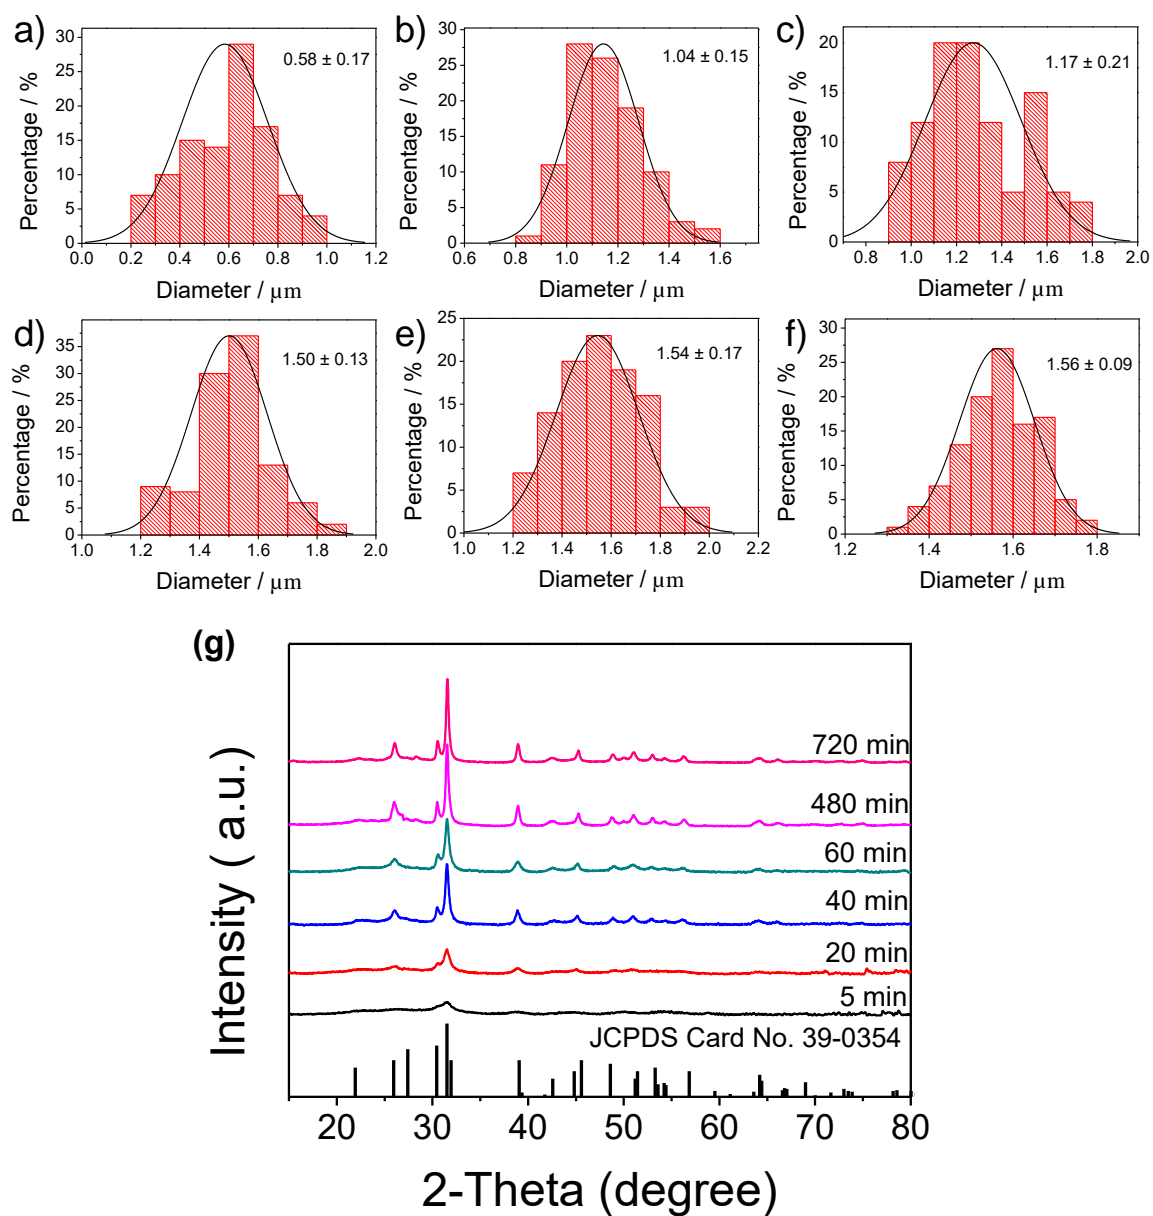

**Figure S2.** (a-f) Diameter graph and (g) XRD patterns of the samples prepared at 5 min, 20 min, 40 min, 60 min, 480 min, and 720 min, respectively.

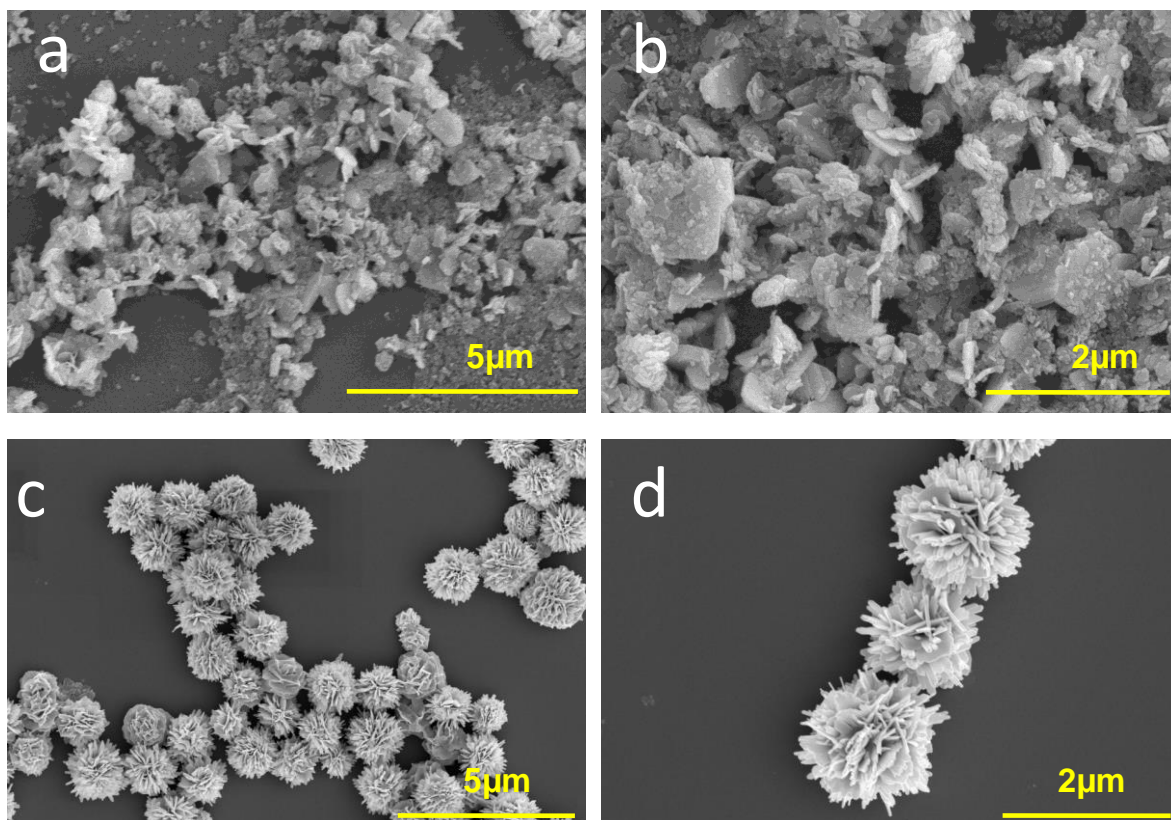

**Figure S3.** SEM image of urchinlike SnS microcrystals synthesized by the same hydrothermal method without (a, b) and with PVP (c, d).

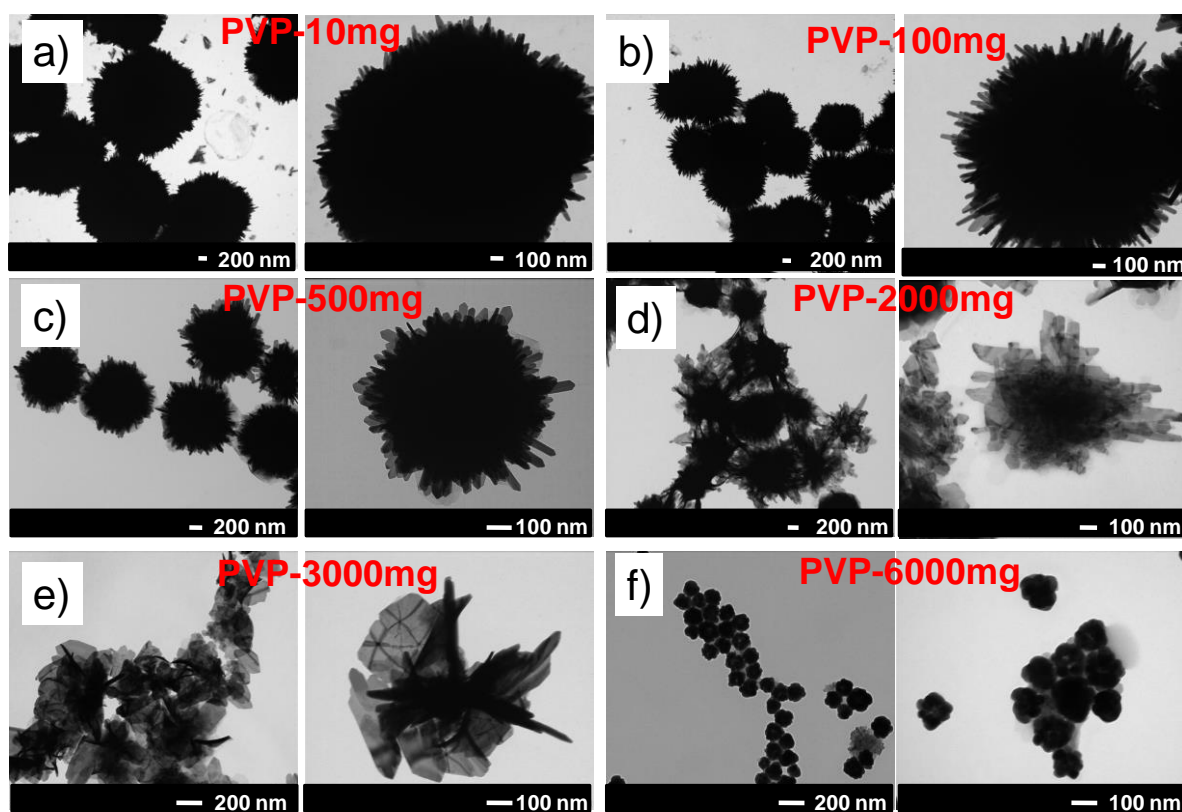

**Figure S4.** TEM images of the samples prepared with different PVP amount in the synthesis system.

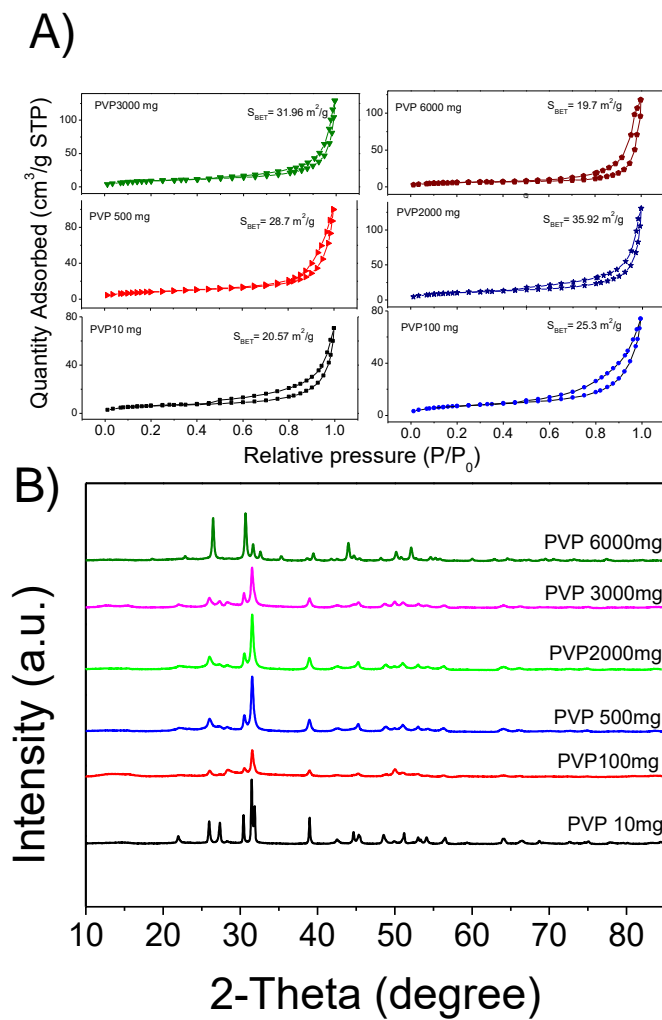

**Figure S5.** (A)  $\text{N}_2$  adsorption-desorption curves and (B) XRD patterns of the samples prepared with different PVP amount.

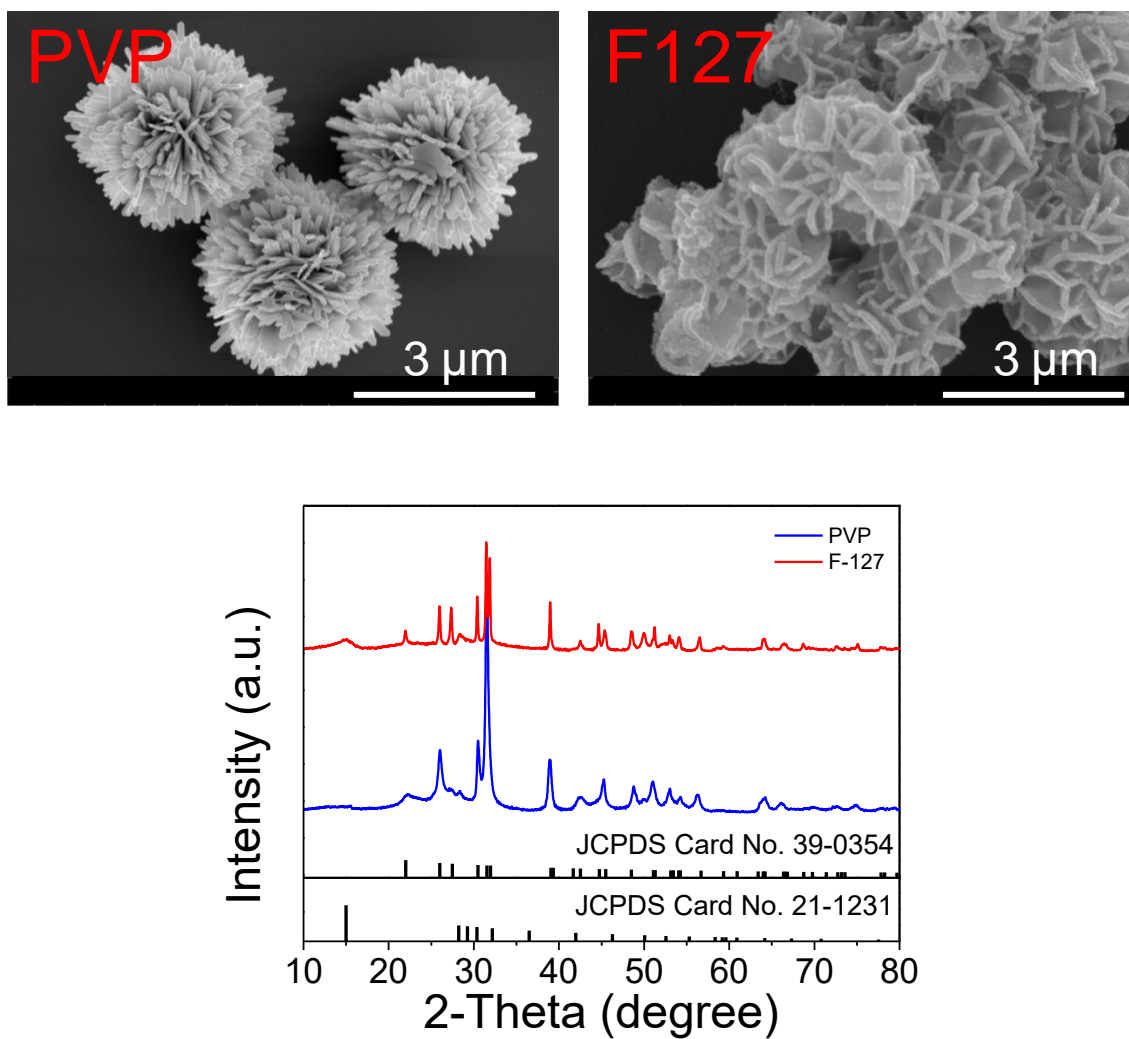

**Figure S6.** SEM images and XRD patterns of the samples prepared with PVP and F127.

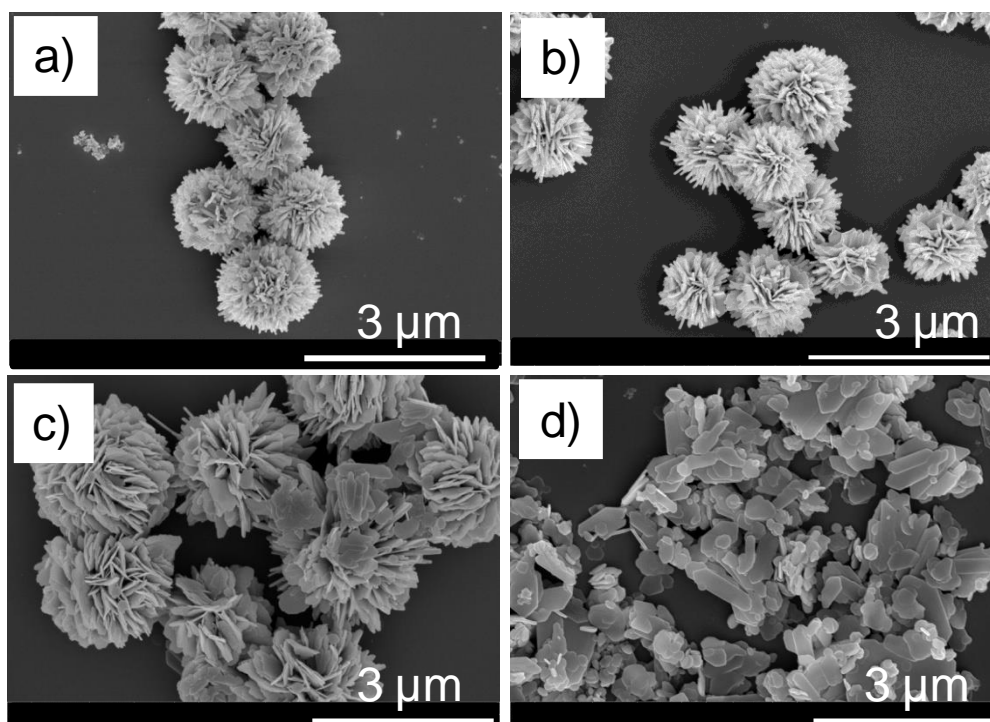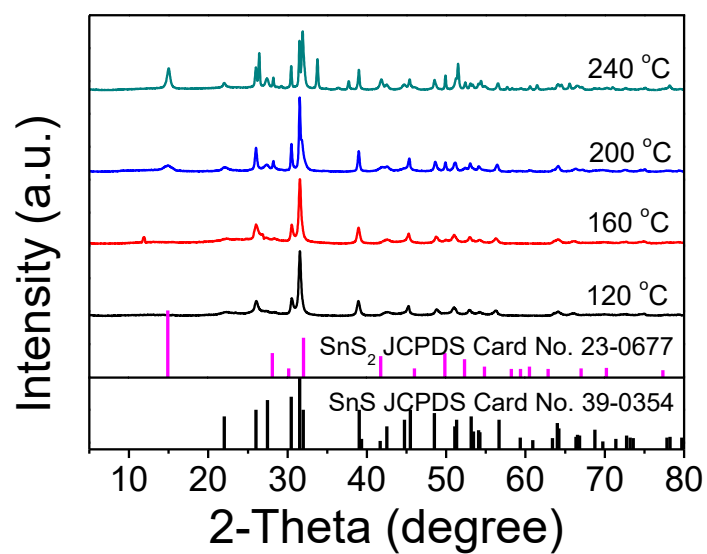

**Figure S7.** SEM images of the SnS products synthesized at various reaction temperatures, (a) 120 °C, (b) 160 °C, (c) 200 °C and (d) 240 °C for 12 h; (e) XRD patterns of the products synthesized at various temperatures for 12 h.

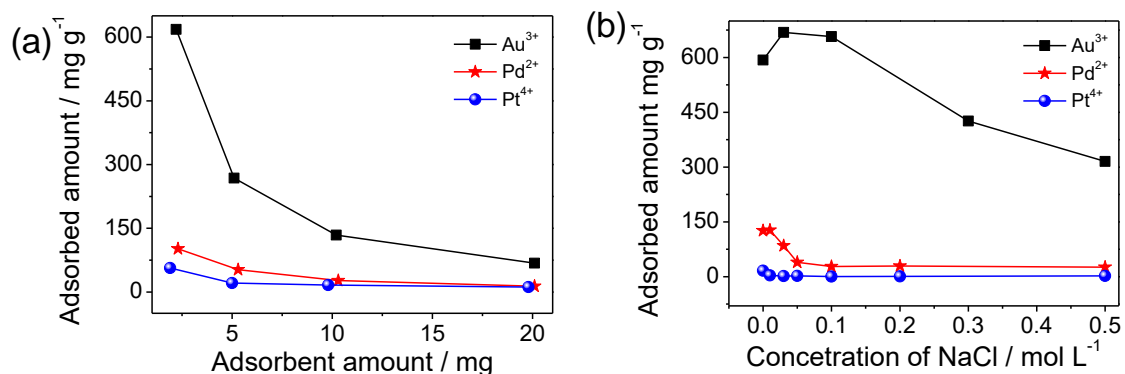

**Figure S8.** (a) Effect of adsorbent on the capture of Au<sup>3+</sup>, Pd<sup>2+</sup>, and Pt<sup>4+</sup> with urchinlike SnS ( $C_i = 150 \text{ mg L}^{-1}$  of Au<sup>3+</sup>,  $25 \text{ mg L}^{-1}$  of Pd<sup>2+</sup> and Pt<sup>4+</sup>; pH=1.13 of Au<sup>3+</sup>, Pd<sup>2+</sup>, and Pt<sup>4+</sup>;  $V = 10 \text{ mL}$ ;  $t = 150 \text{ min}$ ;  $T = 298 \text{ K}$ ). (b) Effect of the ionic strength on the capture of Au<sup>3+</sup>, Pd<sup>2+</sup>, and Pt<sup>4+</sup> with urchinlike SnS ( $m = 2 \pm 0.3 \text{ mg}$ ;  $C_i = 150 \text{ mg L}^{-1}$  for Au<sup>3+</sup>,  $25 \text{ mg L}^{-1}$  for Pd<sup>2+</sup> and Pt<sup>4+</sup>;  $V = 10 \text{ mL}$ ; pH=1.13 of Au<sup>3+</sup>, Pd<sup>2+</sup>, and Pt<sup>4+</sup>;  $t = 150 \text{ min}$ ;  $T = 298 \text{ K}$ ).



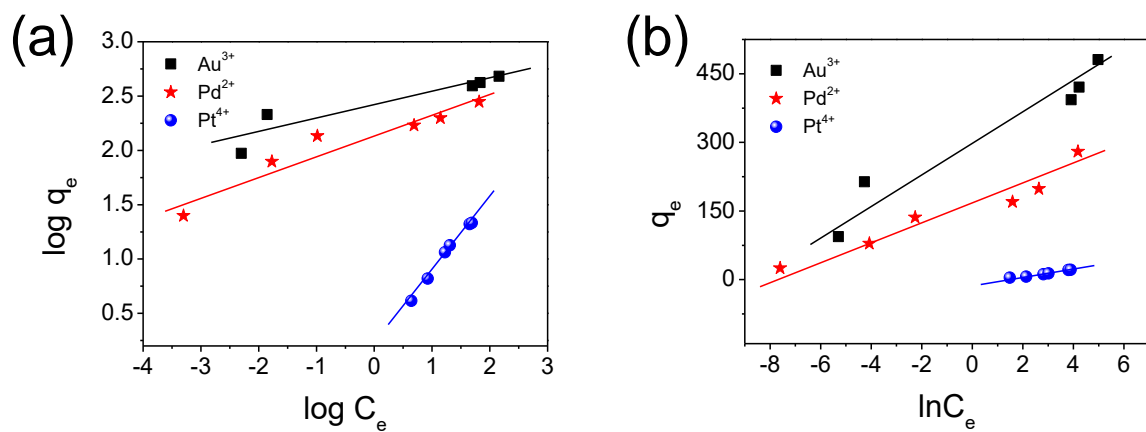

**Figure S9.** (a) Adsorption isotherm curves fitted to Freundlich models and (b) Temkin models of  $\text{Au}^{3+}$ ,  $\text{Pd}^{2+}$ , and  $\text{Pt}^{4+}$  capture on urchinlike SnS microcrystals.

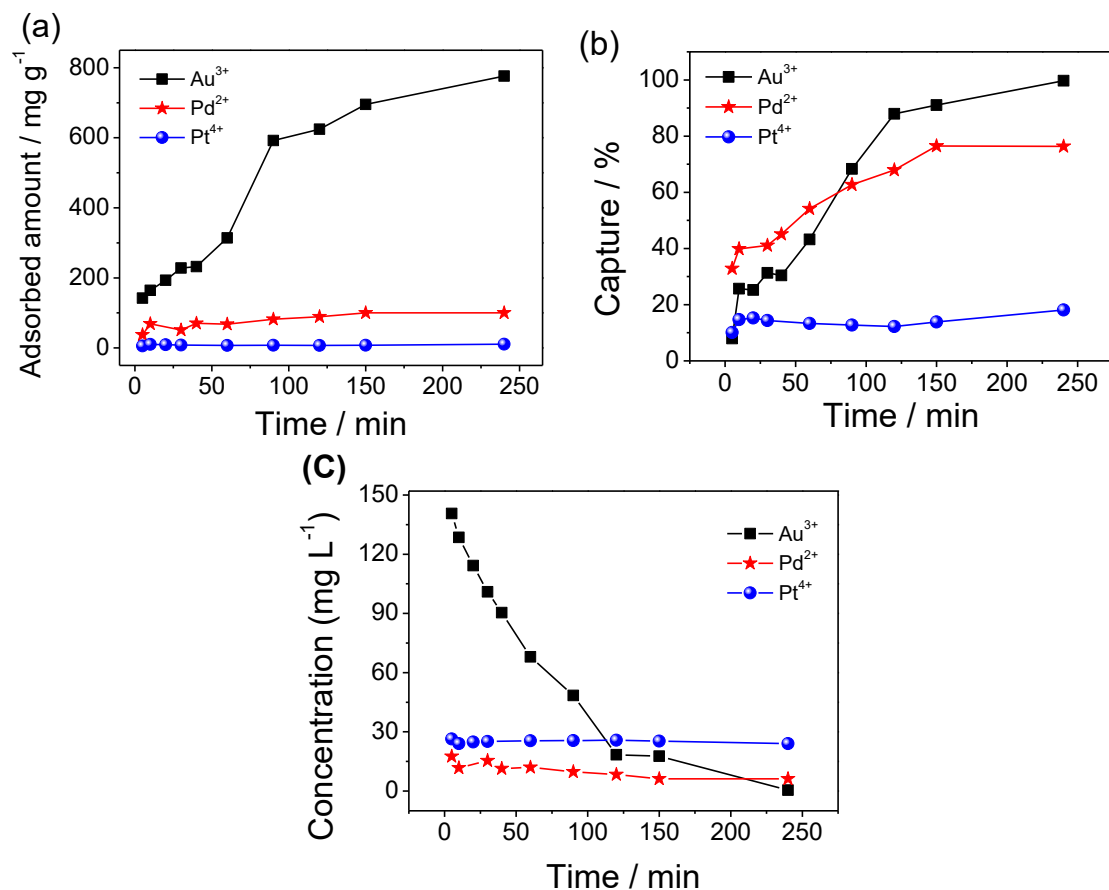

**Figure S10.** (a) Sorption capacity with contact time, (b) capture percentages as a function of contact time, and (c) ion concentration change following contact time. (Condition: adsorbent dosage  $m = 2 \pm 0.2$  mg;  $C_i = 150$  mg L<sup>-1</sup> of  $\text{Au}^{3+}$ , 26 mg L<sup>-1</sup> of  $\text{Pd}^{2+}$ , and 29 mg L<sup>-1</sup> of  $\text{Pt}^{4+}$ ;  $V = 10$  mL; pH = 1.13 of  $\text{Au}^{3+}$ ,  $\text{Pd}^{2+}$ , and  $\text{Pt}^{4+}$ ;  $T = 298$  K).

**Table S1. Parameters obtained from two kinetics models at 298K.**

| Kinetic model       | Kinetic parameters                            | Metal ions             |                        |                        |
|---------------------|-----------------------------------------------|------------------------|------------------------|------------------------|
|                     |                                               | Au <sup>3+</sup>       | Pd <sup>2+</sup>       | Pt <sup>4+</sup>       |
| Pseudo-first-order  | $q_{e, \text{exp}}$ (mg g <sup>-1</sup> )     | <b>777.2</b>           | <b>100.0</b>           | <b>9.624</b>           |
|                     | $q_{e, \text{cal}}$ (mg g <sup>-1</sup> )     | 1097                   | 81.10                  | 4.256                  |
|                     | $k_1$ (min <sup>-1</sup> )                    | 0.0184                 | 0.0161                 | 4.606×10 <sup>-3</sup> |
|                     | $R^2$                                         | 0.9050                 | 0.9800                 | 0.929                  |
| Pseudo-second-order | $q_{e, \text{cal}}$ (mg g <sup>-1</sup> )     | <b>783.4</b>           | <b>105.2</b>           | <b>9.475</b>           |
|                     | $k_2$ (g mg <sup>-1</sup> min <sup>-1</sup> ) | 9.103×10 <sup>-6</sup> | 4.402×10 <sup>-4</sup> | 1.872×10 <sup>-2</sup> |
|                     | $R^2$                                         | 0.993                  | 0.9930                 | 0.9930                 |

**Table S2. Thermodynamic parameters of the adsorption  $\text{Au}^{3+}$ ,  $\text{Pd}^{2+}$ , and  $\text{Pt}^{4+}$  on urchinlike SnS microcrystals.**

| Metal ions       | $\Delta G^\circ$ (KJ mol <sup>-1</sup> ) |       |        |        | $\Delta H^\circ$        | $\Delta S^\circ$                       | $R^2$  |
|------------------|------------------------------------------|-------|--------|--------|-------------------------|----------------------------------------|--------|
|                  | 278K                                     | 288K  | 298K   | 308K   | (KJ mol <sup>-1</sup> ) | (J mol <sup>-1</sup> K <sup>-1</sup> ) |        |
| $\text{Au}^{3+}$ | -0.22                                    | -8.45 | -17.13 | -25.80 | 241.3                   | 867.2                                  | 0.9930 |
| $\text{Pd}^{2+}$ | -3.15                                    | -4.82 | -6.50  | -8.17  | 43.39                   | 167.4                                  | 0.9910 |
| $\text{Pt}^{4+}$ | 1.72                                     | 0.97  | 0.22   | -0.53  | 22.56                   | 74.96                                  | 0.9960 |

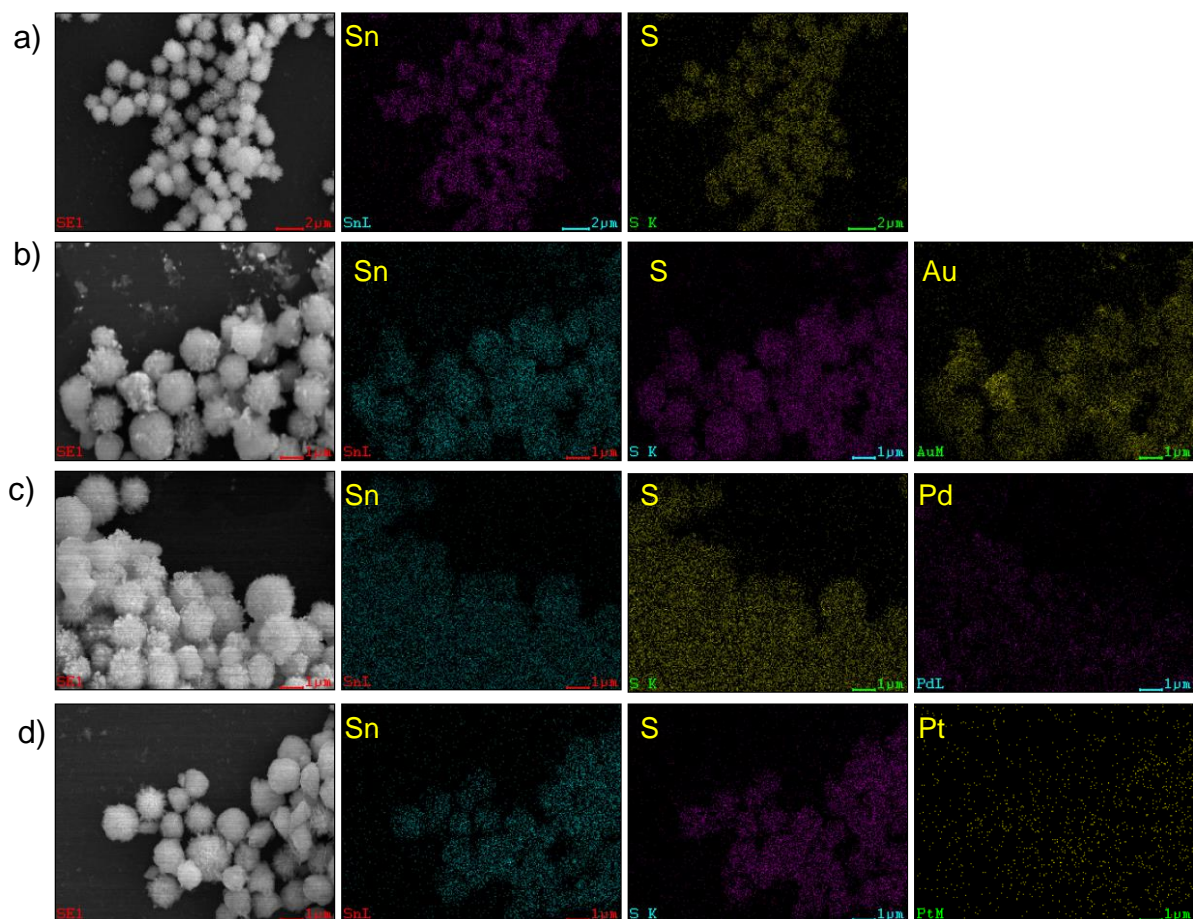

**Figure S11.** SEM image and the corresponding EDX mapping images of the urchinlike SnS microcrystals (a) before and (b-d) after capture  $\text{Au}^{3+}$ ,  $\text{Pd}^{2+}$ , and  $\text{Pt}^{4+}$ .

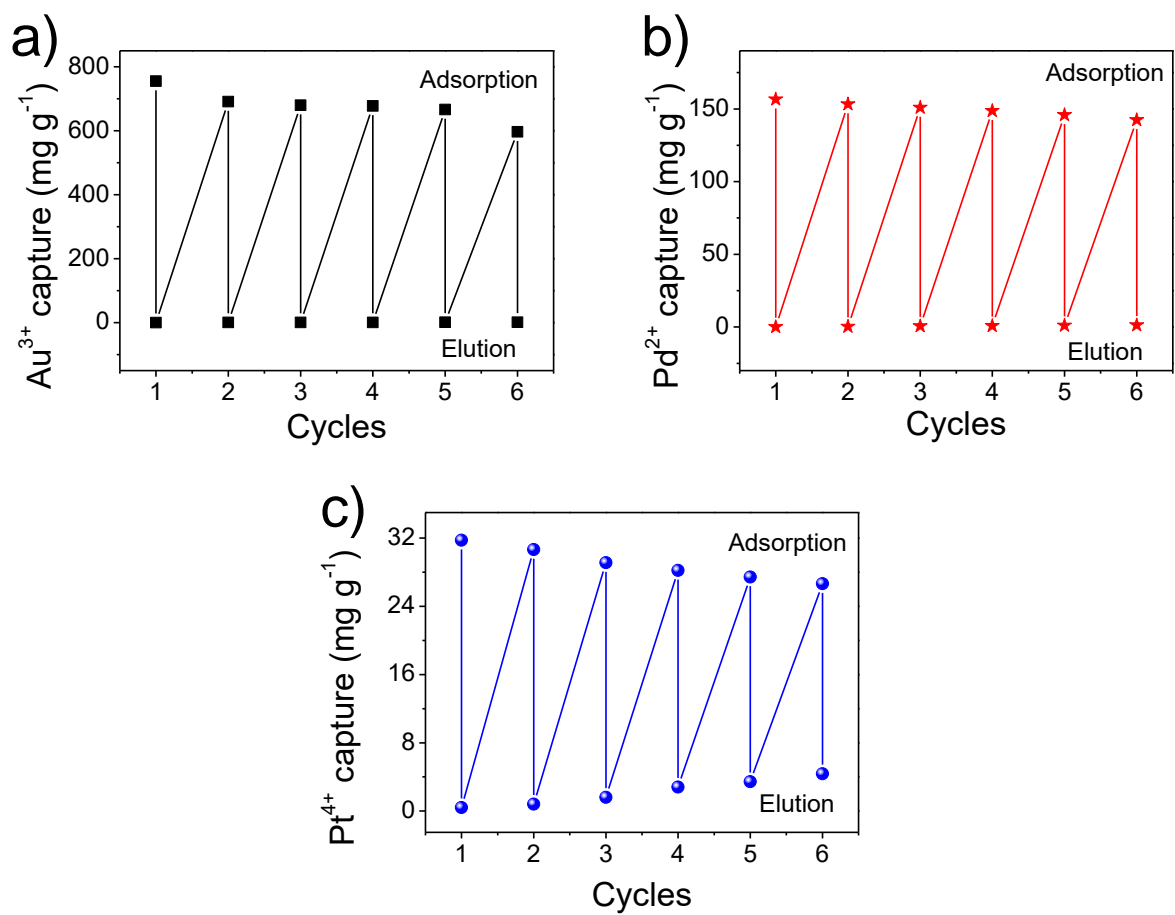

**Figure S12.** Reusability of urchinlike SnS microcrystals for the capture of  $\text{Au}^{3+}$  (a),  $\text{Pd}^{2+}$  (b), and  $\text{Pt}^{4+}$  (c).
